# Supplementary material
Source: PubMed Central journal article supplement (PMC3180808)
Supplement: supp_tpc.111.087254_Isono_Supplemental_Data_Final.pdf [file supp_tpc.111.087254_Isono_Supplemental_Data_Final.pdf]

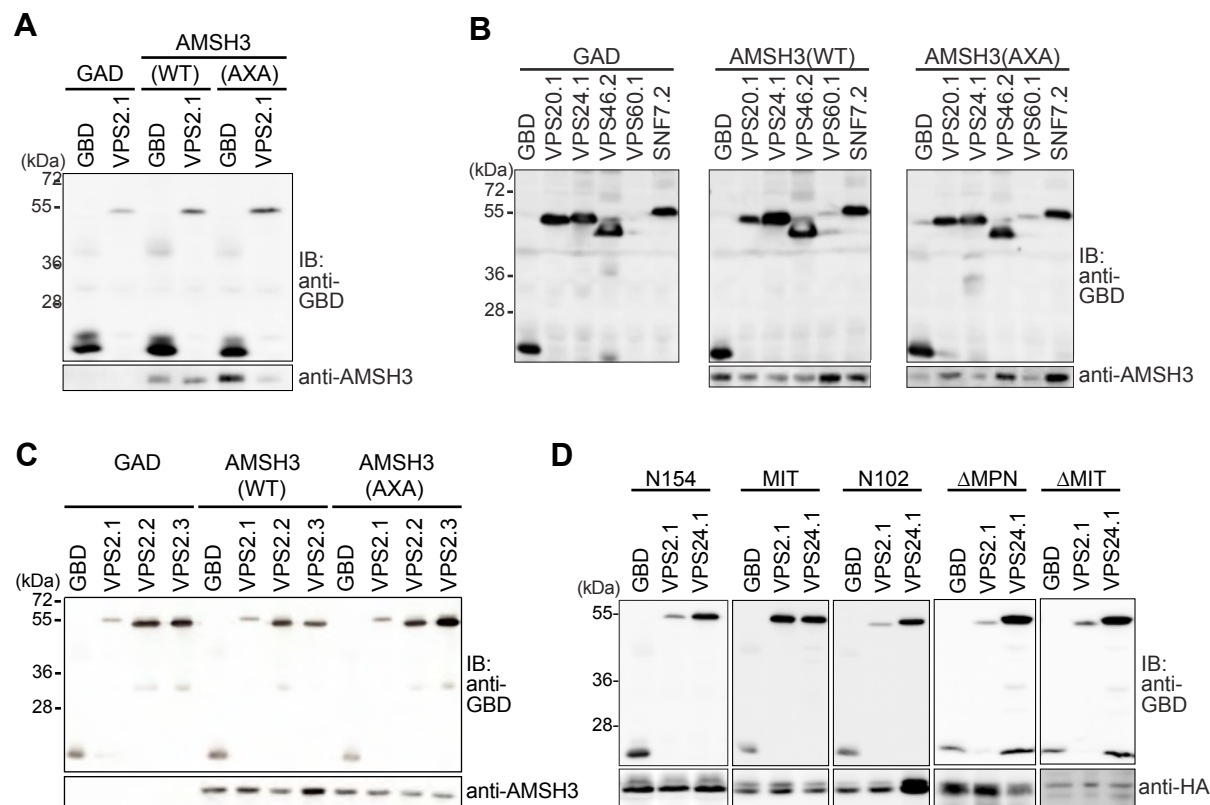

**Supplemental Figure 1: Expression of Y2H constructs.** (A), (B) and (C) Total proteins were extracted from yeast cells used in Figure 1A (A), 1B (B) and 2B (C) and subjected to immunoblotting using an anti-GAL4BD and an anti-AMSH3 antibody. (D) Expression of Y2H constructs shown in Figure 4B was verified by immunoblotting using an anti-GAL4BD and an anti-HA antibody.

## Supplemental Figure 1 (Isono)

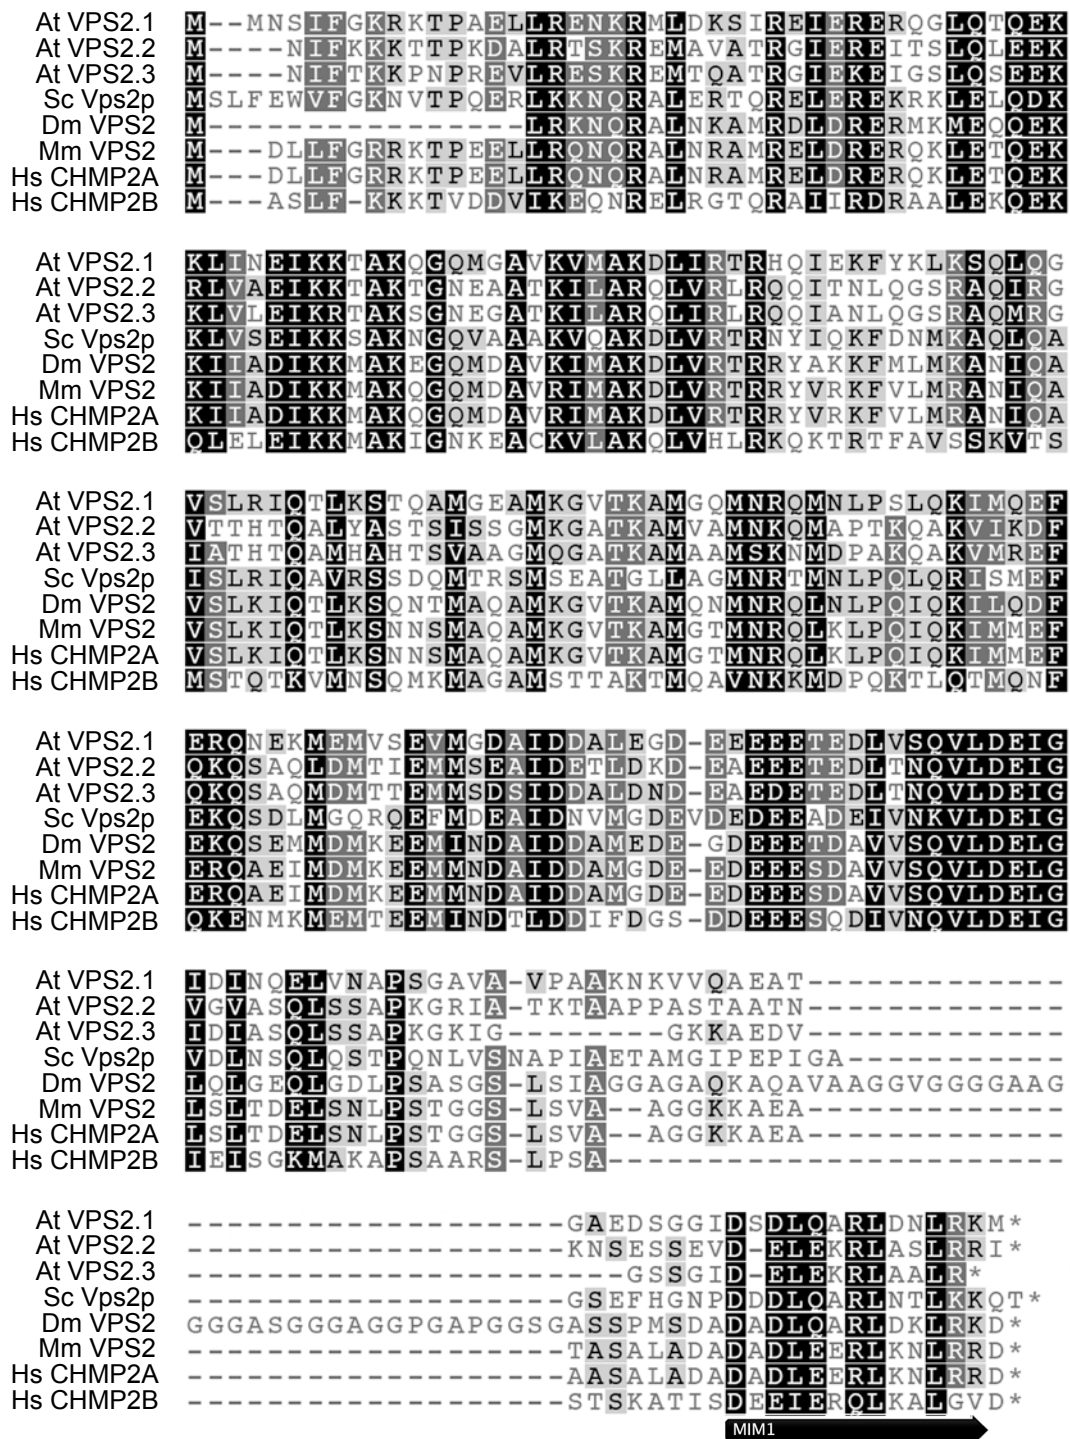

**Supplemental Figure 2: Alignment of VPS2.1 (At VPS2.1), VPS2.2 (At VPS2.2) and VPS2.3 (At VPS2.3) with their counterparts from other organisms.** Protein sequences of budding yeast Vps2p (Sc Vps2p; P36108-1), fruit fly VPS2 (Dm VPS2; Q8SXB1-1), mouse VPS2 (Mm VPS2; Q9DB34-1), human CHMP2A (Hs CHMP2A; O43633-1) and Hs CHMP2B (Q9UQN3-1) were aligned using the MUSCLE algorithm of Geneious software package. The previously described MIM1 (Obita et al., 2007) is indicated.

## Supplemental Figure 2 (Isono)

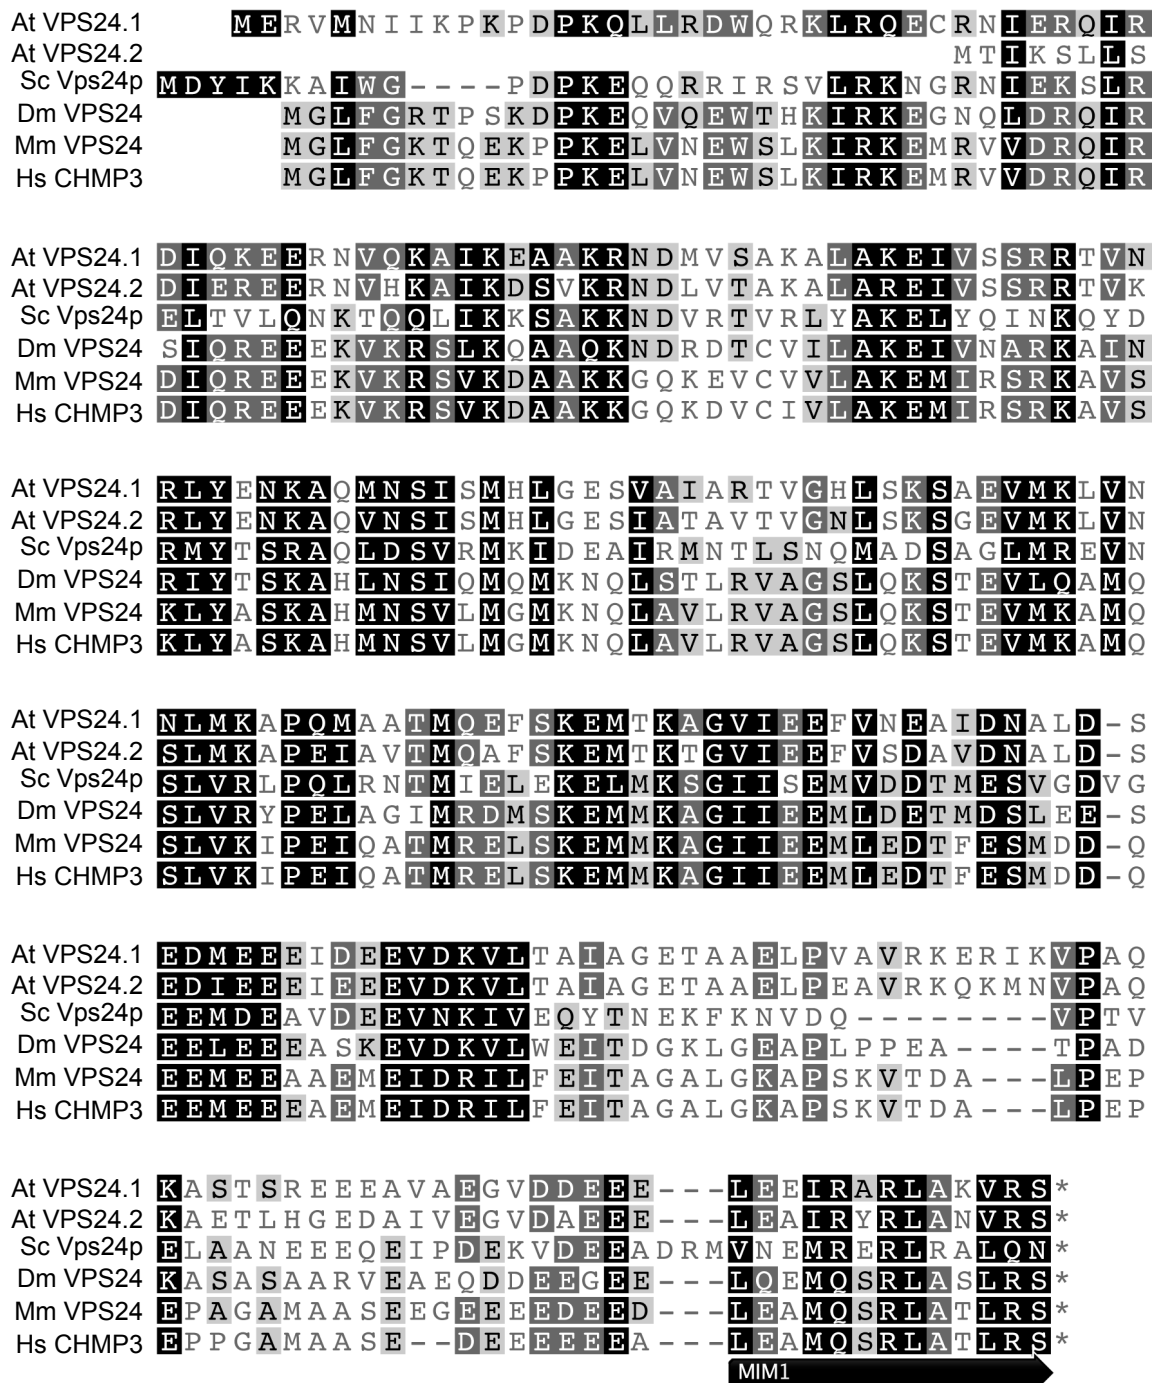

**Supplemental Figure 3: Alignment of VPS24.1 (At VPS24.1) and VPS24.2 (At VPS24.2) with their counterparts from other organisms.** Protein sequences of budding yeast Vps24p (Sc Vps24p; P36095), fruit fly VPS24 (Dm VPS24; Q9VN02), mouse VPS24 (Mm VPS2; Q9CQ10) and human CHMP3 (Hs CHMP3; Q9Y3E7) were aligned using the MUSCLE algorithm of Geneious software package. The previously described MIM1 (Obita et al., 2007) is indicated.

## Supplemental Figure 3 (Isono)

```

At SKD1 1 MYSNFKEOAIEYVKQAVHEDNAGNYNKAFPLIYMNALEYFKT
Sc Vps4p 2 STGDFLTKGIELVOKAIDLDTATOYEAYTAYYNGLDYLML
Dm VPS4 2 AAGTTLOKAIDLVTKATEEDRNKNYAEALRIYEHGVEYFLH
Mm VPS4A 1 MTTSTLOKAIDLVTKATEEDKAKNYEEALRLYOHAVEYFLH
Mm VPS4B 3 STNTNLOKAIDLASKAAQEDKAGNYEEALOLYOHAVOYFLH
Hs VPS4A 1 MTTSTLOKAIDLVTKATEEDKAKNYEEALRLYOHAVEYFLH
Hs VPS4B 3 STSPNLOKAIDLASKAAQEDKAGNYEEALOLYOHAVOYFLH

At SKD1 42 HLKYE-KNPKIREAITOKFTEYLRRAEEIRAVLDEG...
Sc Vps4p 43 ALKYE-KNPKSKDLIRAKFTEYLNRAEOLKKHLESE...
Dm VPS4 43 TIKYEAQGEKAKDSIRAKCLOYLDRAEKLKEYLKKG...
Mm VPS4A 42 AIKYEAHSDKAKESIRAKCMOYLDRAEKLKDYLRNK...
Mm VPS4B 44 VVKYEAQGDKAKQSIRAKCTEYLDRAEKLKEYLKKK...
Hs VPS4A 42 AIKYEAHSDKAKESIRAKCVOYLDRAEKLKDYLRNK...
Hs VPS4B 44 VVKYEAQGDKAKQSIRAKCTEYLDRAEKLKEYLKNK...

```

**Supplemental Figure 4: Alignment of the MIT domain of Arabidopsis SKD1 (AtSKD1) and its counterparts from other organisms.** Protein sequences of budding yeast Vps4p (Sc Vps4p; P52917), fruit fly VPS4 (Dm VPS4; Q9Y162), mouse VPS4A (Mm VPS4A; Q8VEJ9), mouse VPS4B (Mm VPS4B; P46467), human VPS4A (Hs VPS4A; Q9UN37) and human VPS4B (Hs VPS4B; O75351) were aligned using the MUSCLE algorithm of the Geneious software package.

## Supplemental Figure 4 (Isono)



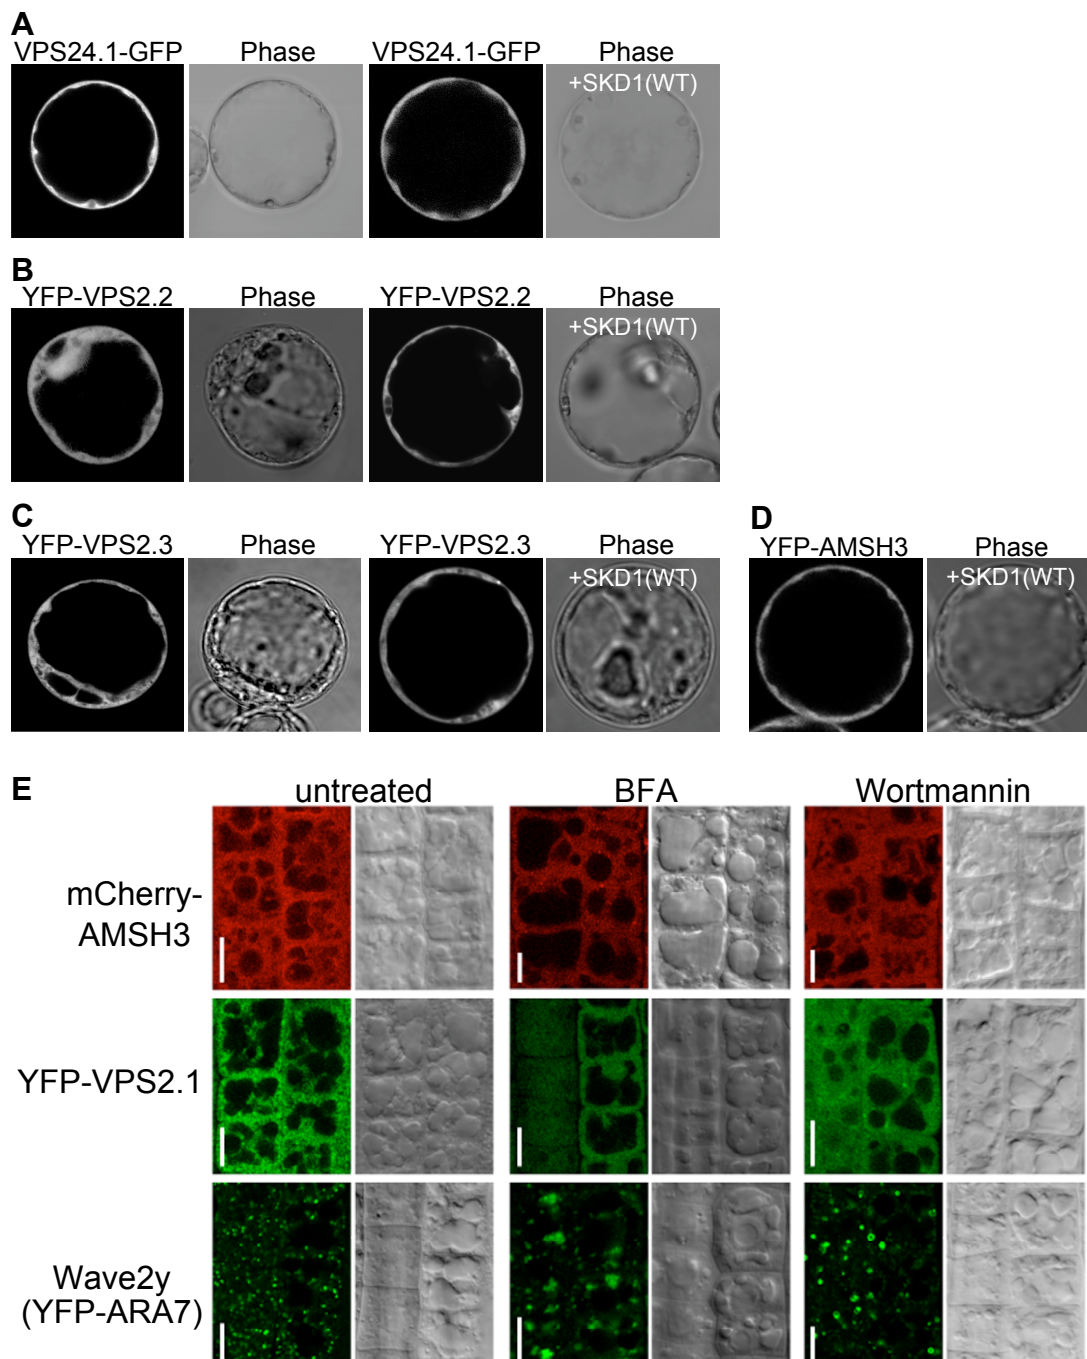

**Supplemental Figure 5: VPS2 proteins, VPS24.1 and AMSH3 are localized to the cytosol.** (A), (B) and (C) 35Spro:VPS24.1-GFP (A), UBQ10pro:YFP-VPS2.2 (B) and 35Spro:YFP-VPS2.3 (C) were transformed in Arabidopsis cell culture-derived protoplasts with or without 35Spro:HA-SKD1(WT) as indicated and observed under a confocal laser scanning microscope. (D) AMSH3pro:YFP-AMSH3 localization upon co-transformation with 35Spro:HA-SKD1 (WT) in cell culture derived protoplasts. (E) Localization of AMSH3 and VPS2.1 are both BFA and Wortmannin insensitive. Arabidopsis seedlings expressing one of UBQ10pro:mCherry-AMSH3, UBQ10pro:YFP-VPS2.1 or UBQ10pro:YFP-ARA7 (Wave2y) were treated with either 50  $\mu$ M Brefeldin A (BFA) for 60 minutes or 33  $\mu$ M Wortmannin for 90 minutes. Root epidermis cells were analyzed under a confocal laser scanning microscope. Note that while the localization of YFP-ARA7 is affected by the treatments, cytosolic localization of both AMSH3 and VPS2.1 remains largely unaffected. Scale bars: 10  $\mu$ m.

## Supplemental Figure 5 (Isono)

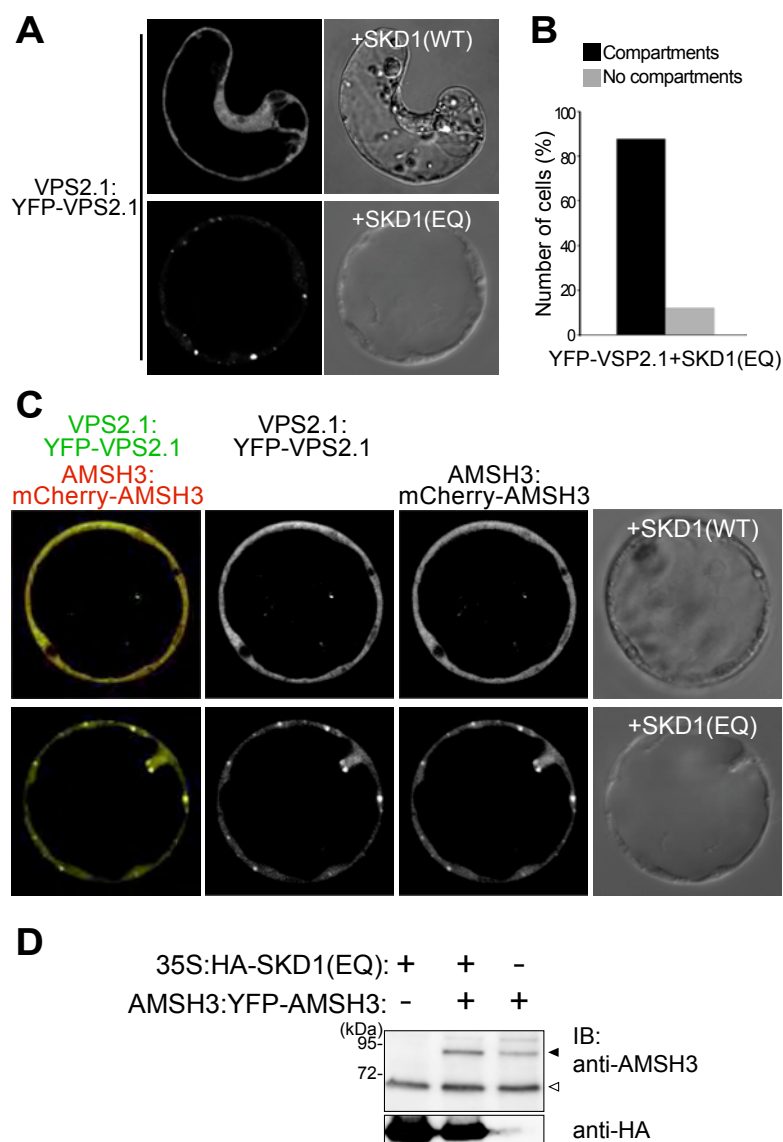

**Supplemental Figure 6: Localization of VPS2.1 expressed under the native promoter.** (A) VPS2.1pro:YFP-VPS2.1 co-expression with either 35Spro:HA-SKD1 (WT) or 35Spro:HA-SKD1(EQ) in Arabidopsis cell culture-derived protoplasts. (B) Quantification of the results of SKD1(EQ) co-expression in (A). Among the VPS2.1pro:YFP-VPS2.1 expressing cells, 87.8% show localization of the YFP fusion proteins in compartments ( $n=41$ ). (C) VPS2.1pro:YFP-VPS2.1 and AMSH3pro:mCherry-AMSH3 were co-transformed with either 35Spro:HA-SKD1(WT) or 35Spro:HA-SKD1(EQ) in Arabidopsis cell culture-derived protoplasts. Both proteins localize to class-E compartments when expressed together with SKD1(EQ). (D) Verification of fusion protein expression in Arabidopsis cell culture-derived protoplasts. Total proteins were extracted from each sample and subjected to immunoblotting using an anti-AMSH3 and an anti-HA antibody. Open arrowhead: endogenous AMSH3; filled arrowhead: YFP-AMSH3.

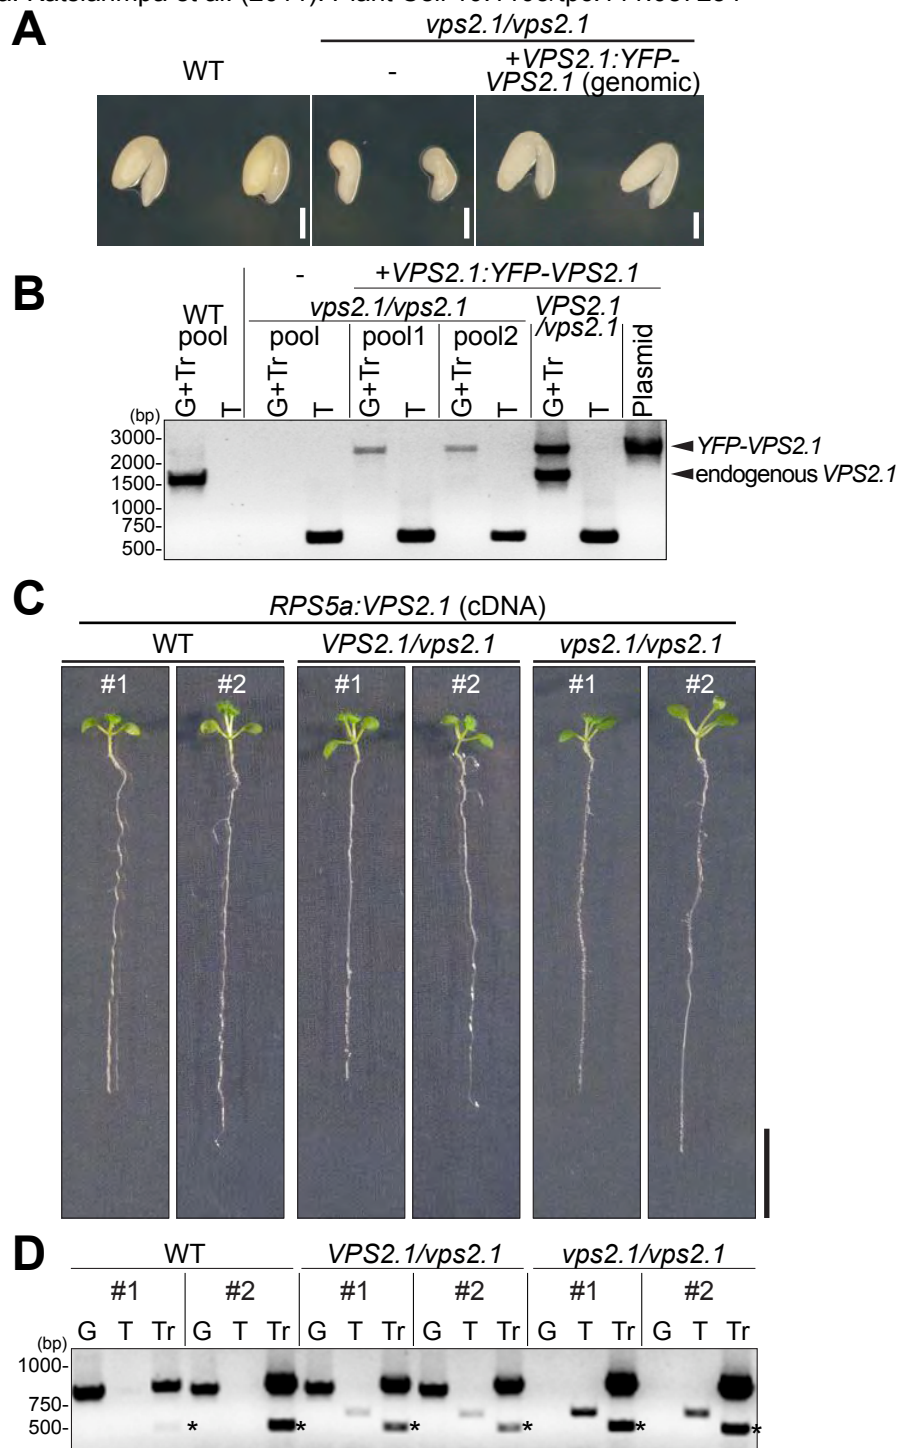

**Supplemental Figure 7. Complementation of the *vps2.1* mutant.** (A) Photographs of *vps2.1* embryos with or without the *VPS2.1* pro:*YFP-VPS2.1* (genomic) construct in comparison to wild type (WT) mature embryos. Scale bar: 0.2 mm. (B) The dissected embryos were genotyped in a pool of 10 embryos. Genotyping PCRs were performed for the endogenous gene and the transgene (lanes: G+Tr) and for the T-DNA (lanes: T). The sequences and combination of primers are shown in Supplemental Table 3 and Supplemental Methods, respectively. (C) Photographs of 13 days-old seedlings expressing *VPS2.1* (cDNA) under the *RPS5a* promoter in WT, *vps2.1* heterozygous or homozygous background. Scale bar: 1 cm. (D) Total DNA were extracted from seedlings photographed in C, and genotyping PCR was performed as in Figure 6C. Genotyping PCRs were performed for the endogenous gene (lanes: G), for the T-DNA (lanes: T) and for the transgene (lanes:Tr). The sequences and combination of primers are shown in Supplemental Table 3 and Supplemental Methods, respectively. \* indicates an unspecific band.

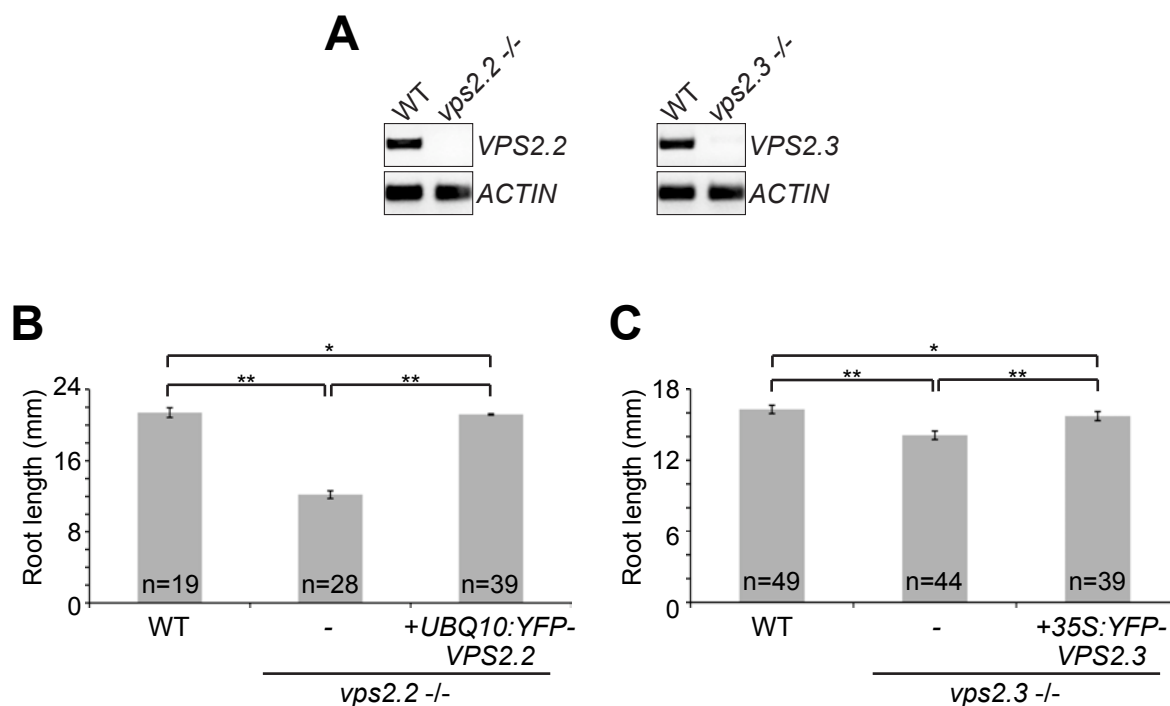

**Supplemental Figure 8: Phenotype and complementation of *vps2.2* and *vps2.3* homozygous mutants.** (A) RT-PCR of full length *VPS2.2* and *VPS2.3* in wild type (WT) and *vps2.2* (left panel) or *vps2.3* (right panel) homozygous mutants, respectively. *ACTIN* was used as a control. To verify the results, the RT-PCR was performed with two replicates and a representative result is shown. (B)(C) *UBQ10pro:YFP-VPS2.2* and *35Spro:YFP-VPS2.3* complement the growth defect phenotype of *vps2.2* and *vps2.3* mutants, respectively. Root length of 5 days-old wild type (WT) and *vps2.2* mutants with (+) or without (-) *UBQ10pro:YFP-VPS2.2* (B) or 4 days-old wild type (WT) and *vps2.3* mutants with (+) or without (-) *35Spro:YFP-VPS2.3* (C) are shown. Numbers of measured seedlings are indicated in the graph. \* indicates no significant difference ( $P>0.05$ ) and \*\* indicates significant difference ( $P<0.01$ ). Error bars: SE.

## Supplemental Figure 8 (Isono)



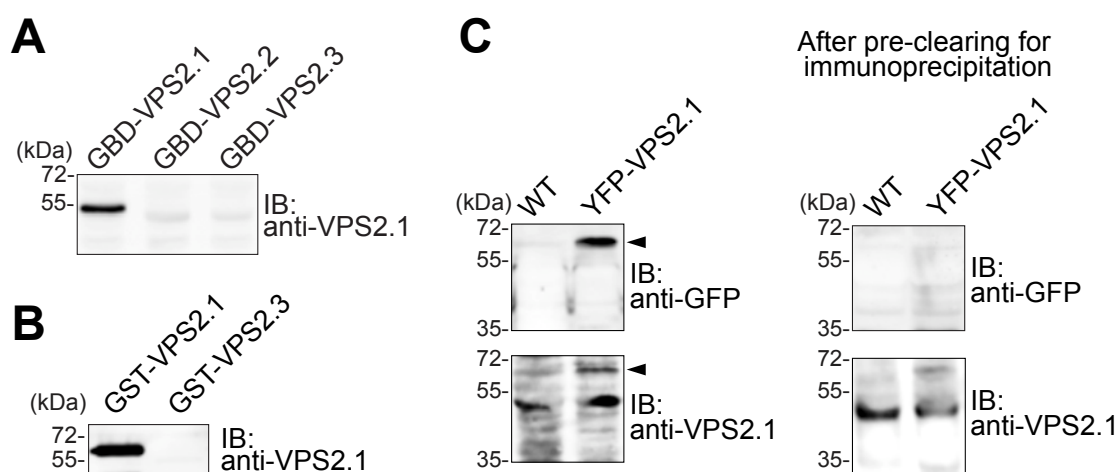

**Supplemental Figure 9: Analysis of the VPS2.1 specific antibody.** (A-C) The VPS2.1 antibody is specific for VPS2.1. Immunoblotting with the anti-VPS2.1 antibody on total extracts from yeast carrying GBD-VPS2.1, GBD-VPS2.2 or GBD-VPS2.3 (A), on purified GST-VPS2.1 and GST-VPS2.3 (B) and on 50  $\mu$ g of total extracts from transgenic plants carrying *UBQ10pro::YFP-VPS2.1* (C, left panels). Arrowheads indicate the position of YFP-VPS2.1. Note that though YFP-VPS2.1 can be detected in plant total extracts (C, left panels), the signal becomes almost undetectable after pre-clearing of the extract for immunoprecipitation (C, right panels).

## Supplemental Figure 9 (Isono)

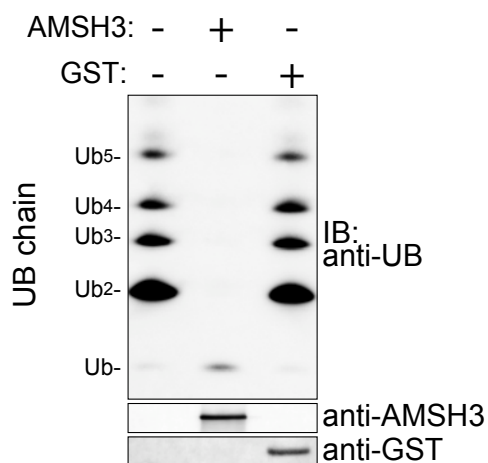

**Supplemental Figure 10: DUB assay with only AMSH3 or GST.** 250  $\mu$ g of ubiquitin chains were incubated with 1 pmol of purified AMSH3 or GST as indicated. The reactions were stopped after 60 minutes, and samples were subjected to immunoblotting using anti-UB, anti-AMSH3 and anti-GST antibodies.

## Supplemental Figure 10 (Isono)

**Supplemental Table 1.** Analysis of embryo development in wild type and *VPS2.1/vps2.1* mutants

| Genotype             | Transgene (segregating)      | Walking stick stage | Torpedo stage or earlier | n   |
|----------------------|------------------------------|---------------------|--------------------------|-----|
| <i>VPS2.1/VPS2.1</i> | None                         | 98%                 | 2%                       | 99  |
| <i>VPS2.1/vps2.1</i> | None                         | 85%                 | 15%                      | 225 |
| <i>VPS2.1/VPS2.1</i> | <i>VPS2.1:YFP-VPS2.1</i>     | 98.7%               | 1.3%                     | 233 |
| <i>VPS2.1/vps2.1</i> | <i>VPS2.1:YFP-VPS2.1</i> (1) | 93.6%               | 6.4%                     | 202 |
| <i>VPS2.1/vps2.1</i> | <i>VPS2.1:YFP-VPS2.1</i> (2) | 95.8%               | 4.2%                     | 240 |

**Supplemental Table 2.** Progeny analysis of wild type and *VPS2.1/vps2.1* heterozygous plants with *VPS2.1pro:YFP-VPS2.1* (genomic) or *RPS5apro:VPS2.1* (cDNA)

| Genotype             | Transgene (segregating)      | Germinated | Ungerminated | Aborted | n   |
|----------------------|------------------------------|------------|--------------|---------|-----|
| <i>VPS2.1/VPS2.1</i> | <i>VPS2.1:YFP-VPS2.1</i>     | 96.2%      | 3.8%         | NA      | 213 |
| <i>VPS2.1/vps2.1</i> | <i>VPS2.1:YFP-VPS2.1</i> (1) | 83.1%      | 15.4%        | 1.5%    | 261 |
| <i>VPS2.1/vps2.1</i> | <i>VPS2.1:YFP-VPS2.1</i> (2) | 81.8%      | 16.8%        | 1.4%    | 143 |
| <i>VPS2.1/VPS2.1</i> | <i>RPS5a: VPS2.1</i>         | 98.2%      | 1.8%         | NA      | 156 |
| <i>VPS2.1/vps2.1</i> | <i>RPS5a: VPS2.1</i> (1)     | 95.2%      | 3.4%         | 1.4%    | 145 |
| <i>VPS2.1/vps2.1</i> | <i>RPS5a: VPS2.1</i> (2)     | 93.8%      | 4.9%         | 1.3%    | 239 |

**Supplemental Table 3:** List of primers used in this study.

| <b>Primer</b>          | <b>Sequence (5' - 3')</b>          |
|------------------------|------------------------------------|
| ACT rv                 | GATGCACAGTTGAAGTGAACCTTG           |
| GAL4-AD                | CTATTCGATGATGAAGATACCCACCAAACC     |
| GABI_8474              | ATAACGCTGCGGACATCTACA              |
| AtAMSH3RV              | AAGGGTCGACGCTGCCCTCTTTTCCT         |
| AK0 (AMSH3 BamHI fw)   | TCGGGGATCCGTATGAAGATTGATCTGAAC     |
| AK1 (VPS2.1 XhoI fw)   | AAGGCTCGAGATGATGAATTCAATCTTCGG     |
| AK2 (VPS2.1 Sall rv)   | AAGGGTCGACTCACATTTTTCTAAGGTTAT     |
| AK3 (VPS2.3 EcoRI fw)  | AAGGGAATCCATGAACATCTTCACTAAG       |
| AK4 (VPS2.3 Sall rv)   | AAGGGTCGACCTATCTAAGCGCCGCCAA       |
| AK21 (VPS2.1 SfiI fw)  | CAGGCCGTCAAGGCCTATGATGAATTCAATC    |
| AK22 (VPS2.1 NotI rv)  | CAGCGGCCGCTCACATTTTTCTAAG          |
| AK32 (VPS2.1 GW fw)    | AAAAAGCAGGCTCCATGATGAATTCAATCTTCGG |
| AK33 (VPS2.1 GW rv)    | AGAAAGCTGGGTATCAGAATCTTACGTGGCAGCT |
| AK38 (pVPS2.1 XhoI rv) | AAGGCTCGAGGATTCAATACCGAAAAAGGTG    |
| AK41 (pVPS2.1 AscI fw) | AAGGGGAGCGCCACGTTGTTGTCGGGAAAATATG |
| AK44 (VPS2.1 D212N fw) | ACAGTGGAGGTATAAACAGTGACCTTCAAGC    |
| AK45 (VPS2.1 D212N rv) | GCTTGAAGGTCCTGTTTATACCTCCACTGT     |
| AK47 (VPS2.3 I199D fw) | TTGGCAGTTCTGGAGATGATGAACTGGAGAA    |
| AK48 (VPS2.3 I199D rv) | TTCTCCAGTTCATCATCTCCAGAACTGCCAA    |



---

|                           |                                     |
|---------------------------|-------------------------------------|
| AK51 (AMSH3-318 Sall rv)  | AAGGGTCGACTAACAGCTTATCCACTAG        |
| AK66 (VPS24.1 BamHI fw)   | AAGGGGATCCATGGAGAGAGTGATGAAC        |
| AK67 (VPS24.1 Sall rv)    | TTGGGTCGACTTAGGATCTAACTTTAGC        |
| AK68 (VPS60.1 BamHI fw)   | AAGGGGATCCATGAGGAGAGTTTTTCGG        |
| AK69 (VPS60.1 Sall rv)    | TTGGGTCGACTTAACCCCGGAGAGAAG         |
| AK70 (AMSH3-48 BamHI fw)  | AAGGGGATCCAGAATCGTATTCCTCTCCGT      |
| AK71 (vps2_F2 fw)         | ACTCGAAATCTACACAAGCGA               |
| AK77 (VPS2.2 EcoRI fw)    | AGGAATTCATATGAACATTTTCAAGAAG        |
| AK78 (VPS2.2 Sall rv)     | AGGTCGACTCAGATTCGTCGTAGCGA          |
| AK88 (AMSH3-320 XhoI fw)  | AAGGCTCGAGATGAGGATGAATCCCGTCAGG     |
| AK90 (VPS24.1 GW fw)      | AAAAAGCAGGCTCCATGGAGAGAGTGATGAACATC |
| AK92 (VPS24.1 GW rv)      | AGAAAGCTGGGTAGGATCTAACTTTAGCGAGCC   |
| AK97 (AMSH3-462 Sall rv)  | AAGGGTCGACTTACGTCCAGGATGGTTGAG      |
| AK100 (vps2_F2 fw-2)      | TGGATACTTTCTCTCACAGGG               |
| AK101 (VPS2.1 genomic rv) | TTGAAAAGTGATCAGCCTCAG               |
| AK105 (pRPS5a fw)         | CTCACGCTCTGTTTCTCTCACC              |
| AK106 (pVPS2.1 fw)        | TCACCTTTTTTCGGTATTGAATC             |
| EI14 (AMSH3 Sall rv)      | AAGGGTCGACTTAGCGGAGATCGAGGACTT      |
| EI141 (tAMSH3 KpnI)       | AAGGGGTACAGCCAACGAGACGTGAGACG       |
| EI180 (pAMSH3 NotI fw)    | AAGGGCGGCCGCTGGTTTGGTAGCCTACTCAC    |
| EI181 (pAMSH3 BamHI rv)   | AAGGGGATCCCTCACCGTATCTGATTATAC      |

---

---

|                      |                                                      |
|----------------------|------------------------------------------------------|
| EI182 (ATG BamHI fw) | AAGGGGATCCATGAAGATTGATCTG                            |
| EI183 (YFP BamHI fw) | AAGGGGATCCATGGTGAGCAAGGGCGAGGA                       |
| EI184 (YFP BamHI rv) | AAGGGGATCCCTTGTACAGCTCGTCCATG                        |
| EI189 (SKD1 GW fw)   | GGGGACAAGTTTGTACAAAAAAGCAGGCTTGTACAGC<br>AATTTCAAGGA |
| EI190 (SKD1 GW rv)   | GGGGACCACTTTGTACAAGAAAGCTGGGTTCAACCTT<br>CTTCTCCAACT |
| EI 193 (SKD1 EQ fw)  | ATTATTTTTGTTGATCAGATAGATTCTTTGTG                     |
| EI 194 (SKD1 EQ rv)  | CACAAAGAATCTATCTGATCAACAAAAATAAT                     |
| VPS2.2 EcoRI fw      | CAGAATTCATGAACATTTTCGAGAAGAAG                        |
| VPS2.2 BamHI rv      | CAGGATCCTCAGATTCGTCGTAGCGA                           |
| VPS24.1 NdeI fw      | CACATATGGAGAGAGTGATGAACATC                           |
| VPS24.1 BamHI rv     | GAGGATCCTTAGGATCTAACTTTAGCGAG                        |
| VPS2.1 NdeI fw       | GACATATGATGAATTCAATCTTCGGAA                          |
| VPS2.1 SmaI rv       | GACCCGGGTCACATTTTTCTAAGGTTATCC                       |
| VPS2.3 NdeI fw       | CACATATGAACATCTTCACTAAGAAAC                          |
| VPS2.3 EcoRI rv      | TCGAATTCCTATCTAAGCGCCGCAA                            |
| VPS46.1 EcoRI fw     | TCGAATTCATGGGTAATACAGATAAGCTG                        |
| VPS46.1 BamHI rv     | CTGGATCCTTAACCTCTGGCTTTAAGCT                         |
| VPS46.2 EcoRI fw     | GAGAATTCATGGGTAACACAGATAAGC                          |
| VPS46.2 BamHI rv     | TAGGATCCTTATCCTCTGGCTTTAAGCT                         |

---

---

|                  |                                         |
|------------------|-----------------------------------------|
| VPS60.1 EcoRI fw | TAGAATTCGCCCTTGAATTGATGAGGAGAGTTTTTCGGC |
|                  | GCGA                                    |
| VPS60.1 BamHI rv | CTGGATCCTTAACCCCGGAGAGAAGCT             |
| VPS20.1 EcoRI fw | CAGAATTCATGGGGAATTTGTCGTGAAG            |
| VPS20.1 BamHI rv | CTGGATCCTCAAGCCGGCAAACCTTC              |
| SNF7.1 EcoRI fw  | TAGAATTCATGATGAATCGGCTATTCGA            |
| SNF7.1 BamHI rv  | TAGGATCCTTAGAGGGCCATCTC                 |
| Actin FW         | ATTCAGATGCCCAGAAGTCTTGTTTC              |
| Actin RV         | GCAAGTGCTGTGATTTCTTTGCTCA               |

---

## Supplemental Methods

**Genotyping PCR:** Genotyping PCR were performed with following primer combinations. For the *vps2.1* mutant primer pairs AK2 and AK71 and GABI\_8474 and AK2 were used. For *vps2.1* mutants with VPS2.1pro:YFP-VPS2.1 (genomic), primer pairs AK101 and AK106 and GABI\_8474 and AK2 were used. For *vps2.1* mutants with RPS5apro:VPS2.1 (cDNA) primer pairs AK100 and AK101, GABI\_8474 and AK2, AK2 and AK105 were used.

**RT-PCR:** Total RNA was extracted from 5-day-old Arabidopsis seedlings using the NucleoSpin RNA Plant (Macherey-Nagel) kit according to the manufacturer's instruction. One microgram of total RNA was subjected to reverse transcription by M-MuLV Reverse Transcriptase (Fermentas) to produce 20  $\mu$ l of cDNA, and 1  $\mu$ l cDNA was used for each PCR.

**Root length measurement:** Seeds were plated on MS growth medium supplemented with 1% sucrose grown vertically to continuous light. After 4 or 5 days of germination, plates were scanned and root length was measured with the IMAGE J software (<http://rsb.info.nih.gov/ij>).

**Production of an anti-VPS2.1 antibody:** For the production of an anti-VPS2.1 antibody, full-length VPS2.1 was purified from *E.coli* Rosetta (DE3) (Merck



Chemicals) strain using the GST-VPS2.1 clone. After the purification, the GST moiety was cleaved off with PreScission protease (GE Healthcare). The antibody was raised in rat (Eurogentec). The serum was purified with a HiTrap Protein G column (GE Healthcare) and subsequently with a VPS2.1 loaded NHS-activated column (GE Healthcare). The anti-VPS2.1 antibody was used in a dilution of 1:1000.
